# Supplementary material for: Natural language processing algorithms for mapping clinical text fragments onto ontology concepts: a systematic review and recommendations for future studies
Source: J Biomed Semantics. 2020 Nov 16;11:14. doi: 10.1186/s13326-020-00231-z (PMC7670625; doi:10.1186/s13326-020-00231-z)
Supplement: Supplementary file 1 — Additional file 1. [file 13326_2020_231_MOESM1_ESM.xlsx]

## Sheet: General
Author	Year	Country	Objective	Induced	Part of challenge	Data Origin	Type of dataset	Data Language	Used system	System	Based on	Used methods	In use	Source
Afshar	2019	USA	Transforming unstructured EHR data into research data for analyses (test: 30-day readmission prediction)	Information extraction	No	Clinical Data Warehouse Data (1.103.038 patients and 83.867.802 clinical documents)	Own	English	New (with existing)	No name	cTAKES	Apache Hive, Hadoop (MapReduce2 and YARN)	Not listed	No, only links to cTAKES source code
Alnazzawi	2016	United Kingdom	Normalize phenotype entity mentions in heterogeneous text types to concepts in the UMLS	Information enrichment	No	PhenoCHF corpus	Existing corpus	English	Existing	MetaMap	-	Rules and Dnorm	Not listed	Not listed
Atutxa	2018	Spain	Encode spontaneous Diagnostic Terms to alleviate the workload of documentation and pharmaco-surveillance experts	Information enrichment	No	EHR documents	Own	Spanish	New	No name	-	Random Forest, Similarity (standard dictionary, SNOMED CT, Wikipedia), Exact match, Bag of words, Wikipedia	Aim to embed it in a human-supervised loop	Yes
Barrett	2013	USA	Detect heterogeneous types of sentinel events from palliative consult letters.	Information extraction	No	Palliative care consult letters	Own	English	New	No name	-	POS-tokenizer, Malt, SVM, decision trees	Not listed	No, but planned
Becker	2016	Germany	Extract concepts in German clinical notes	Information extraction	No	ShARe/CLEF corpus 2013	Existing corpus	German	Existing	cTAKES	-	German OpenNLP Models, Google Translate	Still under development	Not listed
Becker	2019	Germany	Extract and summarize information from plain text clinical notes in German to analyze whether the quality of the results was sufficient to create a prerequisite for the development of a clinical decision support system (CDSS) based on health records for colon and rectal cancer	Information extraction	No	clinical notes of 500 patients with known colorectal cancer (5506 notes)	Own	German	New (with existing)	No name	cTAKES	OpenNLP models + custom UMLS Database	Yes: The algorithm for the automatic identification ofguideline-relevant information from the clinical texts eventually led toan improved quality of care for colorectal patients according to clinicalguidelines.	Not listed
Bejan	2015	USA	Identify treatment relations in clinical text	Information extraction	No	Discharge summaries and the 2020 i2b2/VA challenge dataset	Own / Existing	English	Existing	SEMRep, MEDI	-	-	No	N/A
Castro	2010	Spain	Semantic annotation of Spanish-language clinical notes	Information extraction	No	Clinical notes with 'most relevant information'	Own	Spanish	Existing	MOSTAS	-	-	Not listed	Not listed
Catling	2018	United Kingdom	Representing clinical text and the labels in hierarchical clinical coding ontologies	Software development and evaluation	No	MIMIC-III dataset	Existing corpus	English	New	No name	-	Stanford Tokenizer, word embeddings, RNNs	Not listed	Not listed
Chapman	2004	USA	Automatically identify clinical conditions in emergency department reports	Information extraction	No	Emergency department reports	Own	English	Existing	MetaMap	-	-	Not listed	N/A
Chen	2016	USA	Identify and rank medical terms in EHR notes based on their importance to patients	Information enrichment	No	Discharge summaries and progress notes	Own	English	New (with existing)	FOCUS	MetaMap	MetaMap	Not listed	Not listed
Chiaramello	2016	Italy	Determine if MetaMap could be suitable to extract medical concepts from clinical texts written in other languages (Italian)	Information extraction	No	Clinical notes (cardiology, diabetology, hepatology, nephrology, and oncology)	Own	Italian	Existing	MetaMap	-	Google Translator	Not listed	Not listed
Chodey	2016	USA	Measure performance of semantic analysis by new tools by recognition of mentions of concepts and match them to CUIs	Information extraction	SemEval (2014)	Data from the ICU: Discharge summaries, ECG, echo, and radiology	Existing corpus	English	New (with existing)	No name	cTAKES	CRF++, MetaMap, cTAKES	Not listed	Not listed
Chung	2005	USA	Yield patient-specific detailed cardiac findings in a precise way	Information extraction	No	Echocardiogram reports	Own	English	New (with existing)	No name	MetaMap Transfer	MetaMap Transfer, Perl program	Yes, it will be used to populate a research data registry	Not listed
Combi	2018	Italy	Detect adverse drug reactions	Information extraction	No	VigiSegn reports	Own	Italian/English	New	Magicoder	-		Yes, implemented in VigiFarmaco (already in use)	Pseudocode
deBruijn	2011	Canada	Extraction of medical problems, test, and treatments; classifications of assertions made on medical problems; and classification of realtions between medical concepts	Information extraction	2010 i2b2/VA challenge	Hospital discharge summaries and progress reports (i2b2)	Existing corpus	English	New (with existing)	No name	cTAKES, MetaMap	ConText, Brown clustering, SVM (SVM-light/SVM-struct), PA learner, OpenNLP	Not listed	Not listed
Deisseroth	2019	USA	Phenotype extraction from clinical notes	Information extraction	No	Six sets of real patient data from four different medical centers.	Own	English	New	ClinPhen	-		Not listed	http://bejerano.stanford.edu/clinphen
Demner-Fushman	2017	USA	Develop a replacement for MetaMap Transfer, focussing on real-time processing speed	Software development and evaluation	No	BioScope, NCBI disease corpus, i2b2 2010 challenge corpus, ShARe corpus, LHC test collection	Existing corpus	English	New (with existing)	MetaMap Lite	MetaMap	ConText/NegEx, OpenNLP, Lucene search engine	Yes (other paper)	Yes
Divita	2014	USA	Develop an NLp tool that allows for high throughput while maintaining efficacy.	Software development and evaluation	Parts: i2b2 2010 VA Challenge.	Randomly selected clinical records from the most frequent document types	Own	English	New	SOPHIA	-	SPECIALIST Lexical Tools, LVG tool	Yes, used by Veterancs Informatics and Computing Infrastructure	Yes
Duarte	2018	Portugal	Assigning ICD-10 codes for casues of death to death cetificates, autopsy reports, and clinical bulletins	Information enrichment	No	Death certificates, clinical bulletins, and autopsy reports	Own	Portugese	New	No name	-	Deep Neural Network (keras), SVM mdoels/non-negative matrix factorization (scikit-learn)	Yes, in use by the Portugese Ministry of Health for near real-time death cause surveillance	Not listed
Falis	2019	United Kingdom	Automated ICD coding of clinical text documents (driven by ontological graph of relationships between codes.)	Information extraction	No	MIMIC-III dataset	Existing corpus	English	New	Ontological Attention	-	CNN (embeddings: word2vec + CBOW), multi-view convolutional module, Label-specific (ontological) attention vectors	Not listed	Not listed
Ferrão	2013	Portugal	Assigning ICD-9-CM codes to inpatient episodes	Information enrichment	No	Inpatient adult episodes from the EHR	Own	Portugese	New	No name	-	SVM, MATLAB (FCBF)	Not listed	Not listed
Gerbier	2011	France	Enxtract and encode information found in narrative reports of computerized emergency department medical records	Information extraction	No	Computerized emergency department medical records	Own	French	New	UrgIndex	-	ECMT	Not yet, will be interated into a clinical decision support system	Not listed
GoicoecheaSalazar	2013	Spain	Retrieve information from emergency department records	Information enrichment	No	Diagnostic text from patient records	Own	Spanish	New	No name	-	Rule-based NLP	Not listed	Not listed
Hamid	2013	USA	Identify patients with psychogenic nonepileptic seizures (PNES)	Classification	No	2200 notes of Iraq and Afghanistan veterans from the VA national clinical database	Own	English	Existing	YTEX	-	Naive bayes classifier	Not listed	Not listed
Hassanzadeh	2016	Australia	Extact medical concepts from free-text documents (compare four systems)	Information extraction	No	ShARe/CLEF corpus	Existing corpus	English	Existing	MetaMap, NCBO Annotator, Ontoserver, QuickUMLS	-	-	N/A	N/A
Helwe	2017	Lebanon	Automatic coding of discharge diagnoses	Computer-assisted coding	No	MIMIC-III dataset	Existing corpus	English	New	No name	-	LSTM network, dense neural network, MetaMap, word embeddings, SVM	Not listed	Not listed
Hersh	2001	USA	Automated indexing of radiology reports	Information enrichment	No	Radiology image reports	Own	English	Existing	SAPHIRE	-	-	No, still in development/testing	Pseudocode for the concept-matching algorithm
Hoogendoorn	2015	The Netherlands	Predictive modeling of colorectal cancer	Prediction	No	Consultation notes of patients in a primary care setting	Own	Dutch	New	No name	-	Bag of words, Topic modeling	Not listed	Not listed
Jindal	2013	USA	Event and time extraction from clinical narratives	Information extraction	i2b2 2012 challenge	i2b2 challenge corpus	Existing corpus	English	New (with existing)	No name	MetaMap	SVM (LibSVM), shallow parser (Chunker)	Not listed	Not listed
Kang	2009	Korea	Concept mapping of chief complaints from the EMR	Information extraction	No	Discharge summaries	Own	Korean	New	No name	-	KLT, Naïve Bayes classifier, Memory-based classifier	Not listed	Not listed
Kersloot	2019	The Netherlands	detection of (misspelled) concepts and of attribute relationships between these concepts in free-text clinical notes	Information extraction	No	98 manually annotated (non-small cell) lung cancer charts from 6 different centers	Own	English	New (with existing)	DIRECT	cTAKES	addiitional pre-processing and processing steps	Not listed	https://github.com/martijnkersloot/direct
König	2019	Germany	Develop a generic system that can be easily adapted to deal with new text analytics tasks or types of clinical problems, without requiring substantial training or learning (tested on Drug-disease interactions).	Software development and evaluation	No	Discharge letters from BASE-II study	Own	German	New (with existing)	No name	cTAKES	Terminology server, GATE/JAPE based system, Rule-based system	No (still has to prove its value)	Not listed
Li	2015	USA	Medication discrepancy detection between discharge descriptions and medications documented in free-text notes	Information comparison	No	Clinical notes and discharge prescription lists	Own	English	New (with existing)	No name	cTAKES	MALLET (CRF)	Not yet, but plans to move to production environment	Pseudocode of attribute linkage algorithm
Li	2019	USA	investigate effectiveness of BERT-based models for biomedical or clinical entity normalization	Information extraction	No	1.5 million EHR notes	Own	English	New (with existing)	EhrBERT	BioBERT		Not listed	Not listed
Lingren	2016	USA	Identify children with severe early onset childhood obesity	Classification	No	Structured and unstructured data from two EHR databases	Own	English	New (with existing)	No name	cTAKES	WEKA (SVM), Naïve Bayes	Not listed	NOt listed
Liu	2019	USA	Extracting generic phenotypic concepts from free text	Information extraction	No	50 clinical notes from 2 different institutions + 50 PubMed Case report abstracts	Own / Existing	English	Existing	MetaMapLite, MedLEE, ClinPhen and cTAKES	-	-	Not listed	Not listed
Lowe	2009	USA	Extracting structured information from pathology reports	Information extraction	No	Single-specimen pathology reports	Own	English	Existing	MetaMap Transfer (MMTx)	-	-	Not listed	Not listed
Luo	2014	USA	Automatically capture relations from narrative textwithout supervision	Information extraction	No	Pathology reports	Own	English	New (with existing)	No name	Stanford Parser, MetaMap, SVM, decision trees, Bayesian networks		Currently working on a project in multiple hospitals	Not listed
Meystre	2006	USA	Automate problem list to extract potential medical problems from free-text documents in the EMR	Information enrichment	No	Clinical documents form adult inpatients in a cardiovascular unit	Own	English	New (with existing)	No name	MMTx, Developed NLP module, NegEx		Testing in practice	Not listed
Meystre	2010	USA	Extract medications and details about them from free text	Information extraction	i2b2 medication extraction challenge	i2b2 challenge dataset	Existing corpus	English	New	Textractor	MetaMap Transfer	UIMA framework (OpenNLP module)	Possibility to be integrated in the research infrastructure of the University of Utah Health Sciences Center	Not listed
Minard	2011	France	Extract medical concepts and annotate assertions on concepts and relations between them	Information extraction	2010 i2b2/VA challenge	Discharge summaries and progress notes	Existing corpus	English	New (with existing)	No name	Combinations: (C1) (enhanced version of) Metamap, (C2) Tree tagger, CRF++, (A1) AVM (libsvm), (A2) NegEx, (R1) patterns, (R2) supervised learning, (R3) combination		Not listed	Not listed
Mishra	2019	USA	Capture craniofacial and oralphenotype signatures from electronic health records and evaluate existing oral phenotype ontology coverage	Information extraction	No	Clinical notes from NIH Clinical Center data warehouse (Biomedical Translational Research Information System - BTRIS)	Own	English	Existing	cTAKES	-	-	Not listed	Not listed - used cTAKES
Nguyen	2018	Australia	Computer assisted coding with mappings between SNOMED CT and ICD-10-AM	Computer-assisted coding	No	Hospital progress notes	Own	English	New (with existing)	No name	Medtext		Not listed	Not listed
Oellrich	2015	United Kingdom	Leverage annotations of concept recognition systems for generation of silver standard annotation sets on medical and biological data	Information extraction	No	Pubmed abstract, Clinical Trial, i2b2, SHARE/CLEF 2013	Existing corpus	English	Existing	NCBO annotator, cTAKES, BeCAS, MetaMap	-	-	Not listed	Not listed
Patrick	2011	Australia	Concept annotation, assertion classification, relation classification	Information extraction	2010 i2b2/VA challenge	i2b2 challenge corpus	Existing corpus	English	New	No name	-	MOBY, CRF, SVM, GENIA tagger, TTSCT	Not listed	Not listed
Pérez	2018	Spain	Term normalization in EHR notes	Text processing	No	2850 spontaneous DTs randomly selected entries	Own	Spanish	New	No name	-	Weighted Finite-State Transducers / Joint n-multigram models (text normalization)	Not listed	Not listed
Reátegui	2018	Canada	Extract medical entities (obesity comorbidities) from clinical notes	Information extraction	No	i2b2 challenge data	Existing corpus	English	New (with existing)	No name	Metamap / cTAKES		Not listed	Not listed
Roberts	2011	USA	Identify medical concepts in clinical text and classify assertions	Information extraction	2010 i2b2/VA challenge	2010 i2b2/VA challenge corpus (discharge summaries and progress notes)	Existing corpus	English	New (with existing)	No name	MetaMap	SVM, CRF, NegEx, GENIA, WordNet, PropBank, General Inquirer, Wikipedia	Not listed	Not listed
Rousseau	2019	USA	Compare documentation of relevant clinical information in EHR provider note to computed tomography (CT) order requisition	Information comparison	No	ED encounters for patients with headaches who received head CT	Own	English	Existing	YTEX	-	-	Not listed	Not listed
Savova	2010	USA	Extract information from EMR clinical free text	Information extraction	i2b2 (2006, 2008)	Subset of clinical notes from the EMR	Own	English	New (with existing)	No name	cTAKES	SPECIALIST Lexical Tools, OpenNLP, NegEx	Yes	Yes
Shivade	2015	USA	Automatically identify risk factors for heart disease among diabetic patients	Classification	2014 i2b2/UTHealth challenge	2014 i2b2 challenge corpus	Existing corpus	English	Existing	MetaMap, ConText	-	-	Not listed	Not listed
Shoenbill	2019	USA	Identify lifestyle modification documentation from electronic health records	Information extraction	No	EHR notes from hypertension patients	Own	English	Existing	cTAKES	-	-	Not listed	Not listed
Sohn	2014	USA	Extract medication information and normalize it to RxNorm identifiers	Information extraction	No	Clinical notes with medication mentions	Own	English	New	MedXN	-	AhoCorastic algorithm	Not listed	Yes
Solti	2008	USA	Automatically populate the problem list	Information enrichment	No	Cardiology ambulatory progress notes	Own	English	Existing	MetaMap Transfer (MMTx)	-	-	Not listed	Not listed
Soriano	2019	Spain	Ontology-based named entity recognition ( find the most similar concepts that appear in text )	Information extraction	No	clinical emergency discharge reports	Own	Spanish	New	Snomed2vec	-	word2vec (cbow + skip-gram)	Not yet	https://github.com/NachusS/Snomed2Vec
Soysal	2018	USA	Develop clinical NLP toolkit to allow users to quicly build customized NLP pipelines	Software development and evaluation	Parts: i2b2 (2009 and 2010), ShARe/CLEF 2013, SemEVAL (2014)	Discharge summaries from the 2010 i2b2 challenge, outpatient clinic visit notes, mock clinical documents	Own / Existing	English	New	CLAMP	-	UIMA, CRF (CRFSuite), Regex, Apache Ruta Rule Engine	Yes	Yes
Spasić	2015	United Kingdom	Extract information from MRI reports in relation to knee pathology	Information extraction	No	MRI reports of patients	Own	English	New (with existing)	KneeTex	MetaMap, FlexiTerm		Not listed	Yes
Strauss	2013	USA	Identify and extract information from electronic pathology records	Information extraction	No	Pathology reports of breast and prostate cancer patients	Own	English	New	SCENT	-		Not listed	Yes
Sung	2018	Taiwan	Reduce errors in determining eligibility for intravenous thrombolytic therapy in stroke patients	Information extraction	No	Cases of adult patients with AIS	Own	English	Existing	MetaMap	-	-	Not listed	Not listed
Tchechmedjiev	2018	France	Named entity recognition for French text	Information extraction	No	Quaero (titles from French MEDLINE abstracts and EMEAdrug labels) and CépiDC (ICD-10 coding of death certificates)	Existing corpus	French	New (with existing)	SIFT	NCBO Annotator	mgrep	Yes	http://github.com/sifrproject
Ternois	2018	France	Automated coding of endoscopic procedures in free-text reports.	Classification	No	Endoscopy reports written between 2015 and 2016	Own	French	New	No name	-	Supervised learning (TF-IDF), scikit (RandomForestClassifier, LinearSVC, MultinomialNB, and LogisticRegression)	Not listed	Not listed
Travers	2004	USA	Maximize extraction of standard terms from emergency department text	Information extraction	No	Chief complaint text entries for all emergency department visits	Own	English	New	EMT-P			Not listed	Not listed
Tulkens	2019	Belgium	Unsupervised extraction of clinical concepts	Information extraction	No	i2b2-2010 challenge corpus	Existing corpus	English	New (with existing)	ConCH	FastText, cTAKES	vectors, IDF,	Not listed	www.github.com/clips/conch
Usui	2018	Japan	extracting and standardizing patient complaints from electronic medication histories for the detection of possible adverse drug event signals	Prediction	No	electronic medication history data from pharmacy	Own	Japanese	New	No name	-	Perl, MeCab, Excel	Expect to use it	Not listed
Valtchinov	2019	USA	identify patients with implantable devices that pose safetyrisks for MRI	Classification	No	25,000 radiology reports, 174,769 emergency department (ED) notes, and 41,085 other clinical reports (	Own	English	Existing	YTex	-	Solr	Not listed	Not listed
Wadia	2018	USA	Identification of patients whose computed tomography (CT) reports raised the concern for lung cancer	Classification	No	A total of 450 reports representing 428 patients were analyzed	Own	English	Existing	YTex	-	-	Not listed	Not listed
Walker	2019	USA	extract encoded data from radiation treatment sites in an EMR	Information extraction	No	Treatment sites from EMR	Own	English	New	No name	-		No (but could be)	Not listed
Xie	2019	China	EHR coding: predict diagnosis or procedure codes for clinical notes	Information extraction	No	MIMIC-III dataset	Existing corpus	English	New	MSATT-KG	-	CNN with label-dependent attention layers	Not listed	Not listed
Xu	2011	USA	Detect colorectal cancer patients from the entire EHR	Classification	No	CRC patient cases from the Synthetic Derivative database	Own	English	Existing	MEDLEE	-	heuristic rule-based and ML-based (SVM)	In development	Not listed
Yadav	2013	USA	Automate outcome classification of emergency department CT imaging reports	Prediction	No	Emergency department CT imaging reports	Own	English	Existing	MEDLEE	-	Waikato, CART	Not listed	Yes, command line
Yao	2019	USA	Disease classification	Prediction	No	i2b2 2008 obesity challenge	Existing corpus	English	New (with existing)	No name	MetaMap	word2vec, Solt's system, CNN + Perl scripts	Not listed	Sorl: https://github.com/yao8839836/obesity/tree/master/perl_classifier
Zeng	2018	USA	Identify breast cancer local recurrences	Classification	No	progress notes and breast cancer surgical pathology reports	Own	English	New (with existing)	No name	MetaMap	SVM	Not listed	Not listed
Zhang	2013	USA	Extracting named entities from biomedical text	Information extraction	No	i2b2 corpus and GENIA corpus	Existing corpus	English	New	No name	-		Not listed	Not listed
Zhou	2006	USA	Extract patient information of patients with breast complaints	Information extraction	No	Records of patients with breast compaints	Own	English	New	MedIE	-		In development	Not listed
Zhou	2011	USA	Encode clinical text using different terminologies and establish mappings between twem	Software development and evaluation	No	COPD and CAD patients	Own	English	New	MTERMS	-		Yes (other paper)	Not listed
Zhou	2014	USA	Extract relative information from from free-text clinical documents	Information extraction	No	Admission notes and discharge summaries	Own	English	Existing	MTERMS	-	-	Not listed	Not listed

## Sheet: Terminology systems
Search	Label	Author	Year	Term. Sys.	ATC	CCAM	CPT	DCR	HCPCS	HL7	HPO	ICD-9	ICD-9-CM	ICD-10	ICD-10-AM	ICD-10-CM	ICPC	ICPC-2	KOMET	LOINC	MDD	MEDCIN	MedDRA	MeSh	PPL	RadLex	RxNorm	TRAK	SNOMED-CT	UMLS	WNC
2019	Afshar 2019	Afshar	2019	UMLS (CPT, HCPCS, ICD-10, ICD10CM/ICD9CM, LOINC, MeSH, SNOMED-CT, RxNorm)	FALSE	FALSE	TRUE	FALSE	TRUE	FALSE	FALSE	FALSE	FALSE	TRUE	FALSE	TRUE	FALSE	FALSE	FALSE	TRUE	FALSE	FALSE	FALSE	TRUE	FALSE	FALSE	TRUE	FALSE	FALSE	TRUE	FALSE
2018	Alnazzawi 2016	Alnazzawi	2016	UMLS	FALSE	FALSE	FALSE	FALSE	FALSE	FALSE	FALSE	FALSE	FALSE	FALSE	FALSE	FALSE	FALSE	FALSE	FALSE	FALSE	FALSE	FALSE	FALSE	FALSE	FALSE	FALSE	FALSE	FALSE	FALSE	TRUE	FALSE
2018	Atutxa 2018	Atutxa	2018	ICD (SNOMED-CT for normalization)	FALSE	FALSE	FALSE	FALSE	FALSE	FALSE	FALSE	TRUE	FALSE	FALSE	FALSE	FALSE	FALSE	FALSE	FALSE	FALSE	FALSE	FALSE	FALSE	FALSE	FALSE	FALSE	FALSE	FALSE	TRUE	FALSE	FALSE
2018	Barrett 2013	Barrett	2013	SNOMED CT	FALSE	FALSE	FALSE	FALSE	FALSE	FALSE	FALSE	FALSE	FALSE	FALSE	FALSE	FALSE	FALSE	FALSE	FALSE	FALSE	FALSE	FALSE	FALSE	FALSE	FALSE	FALSE	FALSE	FALSE	TRUE	FALSE	FALSE
2018	Becker 2016	Becker	2016	SNOMED CT (English), UMLS (German)	FALSE	FALSE	FALSE	FALSE	FALSE	FALSE	FALSE	FALSE	FALSE	FALSE	FALSE	FALSE	FALSE	FALSE	FALSE	FALSE	FALSE	FALSE	FALSE	FALSE	FALSE	FALSE	FALSE	FALSE	TRUE	FALSE	FALSE
2019	Becker 2019	Becker	2019	UMLS	FALSE	FALSE	FALSE	FALSE	FALSE	FALSE	FALSE	FALSE	FALSE	FALSE	FALSE	FALSE	FALSE	FALSE	FALSE	FALSE	FALSE	FALSE	FALSE	FALSE	FALSE	FALSE	FALSE	FALSE	FALSE	TRUE	FALSE
2018	Bejan 2015	Bejan	2015	UMLS	FALSE	FALSE	FALSE	FALSE	FALSE	FALSE	FALSE	FALSE	FALSE	FALSE	FALSE	FALSE	FALSE	FALSE	FALSE	FALSE	FALSE	FALSE	FALSE	FALSE	FALSE	FALSE	FALSE	FALSE	FALSE	TRUE	FALSE
2018	Castro 2010	Castro	2010	SNOMED CT	FALSE	FALSE	FALSE	FALSE	FALSE	FALSE	FALSE	FALSE	FALSE	FALSE	FALSE	FALSE	FALSE	FALSE	FALSE	FALSE	FALSE	FALSE	FALSE	FALSE	FALSE	FALSE	FALSE	FALSE	TRUE	FALSE	FALSE
2019	Catling 2018	Catling	2018	ICD-9-CM	FALSE	FALSE	FALSE	FALSE	FALSE	FALSE	FALSE	FALSE	TRUE	FALSE	FALSE	FALSE	FALSE	FALSE	FALSE	FALSE	FALSE	FALSE	FALSE	FALSE	FALSE	FALSE	FALSE	FALSE	FALSE	FALSE	FALSE
2018	Chapman 2004	Chapman	2004	UMLS	FALSE	FALSE	FALSE	FALSE	FALSE	FALSE	FALSE	FALSE	FALSE	FALSE	FALSE	FALSE	FALSE	FALSE	FALSE	FALSE	FALSE	FALSE	FALSE	FALSE	FALSE	FALSE	FALSE	FALSE	FALSE	TRUE	FALSE
2018	Chen 2016	Chen	2016	UMLS	FALSE	FALSE	FALSE	FALSE	FALSE	FALSE	FALSE	FALSE	FALSE	FALSE	FALSE	FALSE	FALSE	FALSE	FALSE	FALSE	FALSE	FALSE	FALSE	FALSE	FALSE	FALSE	FALSE	FALSE	FALSE	TRUE	FALSE
2018	Chiaramello 2016	Chiaramello	2016	UMLS	FALSE	FALSE	FALSE	FALSE	FALSE	FALSE	FALSE	FALSE	FALSE	FALSE	FALSE	FALSE	FALSE	FALSE	FALSE	FALSE	FALSE	FALSE	FALSE	FALSE	FALSE	FALSE	FALSE	FALSE	FALSE	TRUE	FALSE
2018	Chodey 2016	Chodey	2016	UMLS	FALSE	FALSE	FALSE	FALSE	FALSE	FALSE	FALSE	FALSE	FALSE	FALSE	FALSE	FALSE	FALSE	FALSE	FALSE	FALSE	FALSE	FALSE	FALSE	FALSE	FALSE	FALSE	FALSE	FALSE	FALSE	TRUE	FALSE
2018	Chung 2005	Chung	2005	UMLS	FALSE	FALSE	FALSE	FALSE	FALSE	FALSE	FALSE	FALSE	FALSE	FALSE	FALSE	FALSE	FALSE	FALSE	FALSE	FALSE	FALSE	FALSE	FALSE	FALSE	FALSE	FALSE	FALSE	FALSE	FALSE	TRUE	FALSE
2018	Combi 2018	Combi	2018	MedDRA	FALSE	FALSE	FALSE	FALSE	FALSE	FALSE	FALSE	FALSE	FALSE	FALSE	FALSE	FALSE	FALSE	FALSE	FALSE	FALSE	FALSE	FALSE	TRUE	FALSE	FALSE	FALSE	FALSE	FALSE	FALSE	FALSE	FALSE
2018	deBruijn 2011	deBruijn	2011	UMLS	FALSE	FALSE	FALSE	FALSE	FALSE	FALSE	FALSE	FALSE	FALSE	FALSE	FALSE	FALSE	FALSE	FALSE	FALSE	FALSE	FALSE	FALSE	FALSE	FALSE	FALSE	FALSE	FALSE	FALSE	FALSE	TRUE	FALSE
2019	Deisseroth 2019	Deisseroth	2019	HPO	FALSE	FALSE	FALSE	FALSE	FALSE	FALSE	TRUE	FALSE	FALSE	FALSE	FALSE	FALSE	FALSE	FALSE	FALSE	FALSE	FALSE	FALSE	FALSE	FALSE	FALSE	FALSE	FALSE	FALSE	FALSE	FALSE	FALSE
2018	Demner-Fushman 2017	Demner-Fushman	2017	UMLS	FALSE	FALSE	FALSE	FALSE	FALSE	FALSE	FALSE	FALSE	FALSE	FALSE	FALSE	FALSE	FALSE	FALSE	FALSE	FALSE	FALSE	FALSE	FALSE	FALSE	FALSE	FALSE	FALSE	FALSE	FALSE	TRUE	FALSE
2018	Divita 2014	Divita	2014	UMLS (level 0+9)	FALSE	FALSE	FALSE	FALSE	FALSE	FALSE	FALSE	FALSE	FALSE	FALSE	FALSE	FALSE	FALSE	FALSE	FALSE	FALSE	FALSE	FALSE	FALSE	FALSE	FALSE	FALSE	FALSE	FALSE	FALSE	TRUE	FALSE
2018	Duarte 2018	Duarte	2018	ICD-10	FALSE	FALSE	FALSE	FALSE	FALSE	FALSE	FALSE	FALSE	FALSE	TRUE	FALSE	FALSE	FALSE	FALSE	FALSE	FALSE	FALSE	FALSE	FALSE	FALSE	FALSE	FALSE	FALSE	FALSE	FALSE	FALSE	FALSE
2019	Falis 2019	Falis	2019	ICD-9	FALSE	FALSE	FALSE	FALSE	FALSE	FALSE	FALSE	TRUE	FALSE	FALSE	FALSE	FALSE	FALSE	FALSE	FALSE	FALSE	FALSE	FALSE	FALSE	FALSE	FALSE	FALSE	FALSE	FALSE	FALSE	FALSE	FALSE
2018	Ferrão 2013	Ferrão	2013	ICD-9-CM	FALSE	FALSE	FALSE	FALSE	FALSE	FALSE	FALSE	FALSE	TRUE	FALSE	FALSE	FALSE	FALSE	FALSE	FALSE	FALSE	FALSE	FALSE	FALSE	FALSE	FALSE	FALSE	FALSE	FALSE	FALSE	FALSE	FALSE
2018	Gerbier 2011	Gerbier	2011	ICD-10, CCAM, SNOMED CT, ATC, MeSH, ICPC-2, DCR	TRUE	TRUE	FALSE	TRUE	FALSE	FALSE	FALSE	FALSE	FALSE	TRUE	FALSE	FALSE	FALSE	TRUE	FALSE	FALSE	FALSE	FALSE	FALSE	TRUE	FALSE	FALSE	FALSE	FALSE	TRUE	FALSE	FALSE
2018	GoicoecheaSalazar 2013	GoicoecheaSalazar	2013	ICD-9-CM	FALSE	FALSE	FALSE	FALSE	FALSE	FALSE	FALSE	FALSE	TRUE	FALSE	FALSE	FALSE	FALSE	FALSE	FALSE	FALSE	FALSE	FALSE	FALSE	FALSE	FALSE	FALSE	FALSE	FALSE	FALSE	FALSE	FALSE
2019	Hamid 2013	Hamid	2013	UMLS	FALSE	FALSE	FALSE	FALSE	FALSE	FALSE	FALSE	FALSE	FALSE	FALSE	FALSE	FALSE	FALSE	FALSE	FALSE	FALSE	FALSE	FALSE	FALSE	FALSE	FALSE	FALSE	FALSE	FALSE	FALSE	TRUE	FALSE
2018	Hassanzadeh 2016	Hassanzadeh	2016	UMLS, SNOMED CT	FALSE	FALSE	FALSE	FALSE	FALSE	FALSE	FALSE	FALSE	FALSE	FALSE	FALSE	FALSE	FALSE	FALSE	FALSE	FALSE	FALSE	FALSE	FALSE	FALSE	FALSE	FALSE	FALSE	FALSE	TRUE	TRUE	FALSE
2018	Helwe 2017	Helwe	2017	UMLS, ICD	FALSE	FALSE	FALSE	FALSE	FALSE	FALSE	FALSE	FALSE	TRUE	FALSE	FALSE	FALSE	FALSE	FALSE	FALSE	FALSE	FALSE	FALSE	FALSE	FALSE	FALSE	FALSE	FALSE	FALSE	FALSE	TRUE	FALSE
2018	Hersh 2001	Hersh	2001	UMLS	FALSE	FALSE	FALSE	FALSE	FALSE	FALSE	FALSE	FALSE	FALSE	FALSE	FALSE	FALSE	FALSE	FALSE	FALSE	FALSE	FALSE	FALSE	FALSE	FALSE	FALSE	FALSE	FALSE	FALSE	FALSE	TRUE	FALSE
2018	Hoogendoorn 2015	Hoogendoorn	2015	SNOMED-CT, UMLS, ICPC	FALSE	FALSE	FALSE	FALSE	FALSE	FALSE	FALSE	FALSE	FALSE	FALSE	FALSE	FALSE	TRUE	FALSE	FALSE	FALSE	FALSE	FALSE	FALSE	FALSE	FALSE	FALSE	FALSE	FALSE	TRUE	TRUE	FALSE
2018	Jindal 2013	Jindal	2013	UMLS, SNOMED CT, MeSH	FALSE	FALSE	FALSE	FALSE	FALSE	FALSE	FALSE	FALSE	FALSE	FALSE	FALSE	FALSE	FALSE	FALSE	FALSE	FALSE	FALSE	FALSE	FALSE	TRUE	FALSE	FALSE	FALSE	FALSE	TRUE	TRUE	FALSE
2018	Kang 2009	Kang	2009	KOMET, UMLS	FALSE	FALSE	FALSE	FALSE	FALSE	FALSE	FALSE	FALSE	FALSE	FALSE	FALSE	FALSE	FALSE	FALSE	TRUE	FALSE	FALSE	FALSE	FALSE	FALSE	FALSE	FALSE	FALSE	FALSE	FALSE	TRUE	FALSE
2019	Kersloot 2019	Kersloot	2019	SNOMED CT	FALSE	FALSE	FALSE	FALSE	FALSE	FALSE	FALSE	FALSE	FALSE	FALSE	FALSE	FALSE	FALSE	FALSE	FALSE	FALSE	FALSE	FALSE	FALSE	FALSE	FALSE	FALSE	FALSE	FALSE	TRUE	FALSE	FALSE
2019	König 2019	König	2019	Wingert-Nomenclature(WNC)	FALSE	FALSE	FALSE	FALSE	FALSE	FALSE	FALSE	FALSE	FALSE	FALSE	FALSE	FALSE	FALSE	FALSE	FALSE	FALSE	FALSE	FALSE	FALSE	FALSE	FALSE	FALSE	FALSE	FALSE	FALSE	FALSE	TRUE
2018	Li 2015	Li	2015	UMLS, SNOMED CT, RxNorm	FALSE	FALSE	FALSE	FALSE	FALSE	FALSE	FALSE	FALSE	FALSE	FALSE	FALSE	FALSE	FALSE	FALSE	FALSE	FALSE	FALSE	FALSE	FALSE	FALSE	FALSE	FALSE	TRUE	FALSE	TRUE	TRUE	FALSE
2019	Li 2019	Li	2019	UMLS, SNOMED-CT and MedDRA	FALSE	FALSE	FALSE	FALSE	FALSE	FALSE	FALSE	FALSE	FALSE	FALSE	FALSE	FALSE	FALSE	FALSE	FALSE	FALSE	FALSE	FALSE	TRUE	FALSE	FALSE	FALSE	FALSE	FALSE	TRUE	TRUE	FALSE
2018	Lingren 2016	Lingren	2016	UMLS, ICD-9, RxNorm	FALSE	FALSE	FALSE	FALSE	FALSE	FALSE	FALSE	TRUE	FALSE	FALSE	FALSE	FALSE	FALSE	FALSE	FALSE	FALSE	FALSE	FALSE	FALSE	FALSE	FALSE	FALSE	TRUE	FALSE	FALSE	TRUE	FALSE
2019	Liu 2019	Liu	2019	HPO	FALSE	FALSE	FALSE	FALSE	FALSE	FALSE	TRUE	FALSE	FALSE	FALSE	FALSE	FALSE	FALSE	FALSE	FALSE	FALSE	FALSE	FALSE	FALSE	FALSE	FALSE	FALSE	FALSE	FALSE	FALSE	FALSE	FALSE
2018	Lowe 2009	Lowe	2009	UMLS, SNOMED CT	FALSE	FALSE	FALSE	FALSE	FALSE	FALSE	FALSE	FALSE	FALSE	FALSE	FALSE	FALSE	FALSE	FALSE	FALSE	FALSE	FALSE	FALSE	FALSE	FALSE	FALSE	FALSE	FALSE	FALSE	TRUE	TRUE	FALSE
2018	Luo 2014	Luo	2014	UMLS, SNOMED CT	FALSE	FALSE	FALSE	FALSE	FALSE	FALSE	FALSE	FALSE	FALSE	FALSE	FALSE	FALSE	FALSE	FALSE	FALSE	FALSE	FALSE	FALSE	FALSE	FALSE	FALSE	FALSE	FALSE	FALSE	TRUE	TRUE	FALSE
2018	Meystre 2006	Meystre	2006	UMLS (level 0), SNOMED	FALSE	FALSE	FALSE	FALSE	FALSE	FALSE	FALSE	FALSE	FALSE	FALSE	FALSE	FALSE	FALSE	FALSE	FALSE	FALSE	FALSE	FALSE	FALSE	FALSE	FALSE	FALSE	FALSE	FALSE	TRUE	TRUE	FALSE
2019	Meystre 2010	Meystre	2010	UMLS	FALSE	FALSE	FALSE	FALSE	FALSE	FALSE	FALSE	FALSE	FALSE	FALSE	FALSE	FALSE	FALSE	FALSE	FALSE	FALSE	FALSE	FALSE	FALSE	FALSE	FALSE	FALSE	FALSE	FALSE	FALSE	TRUE	FALSE
2018	Minard 2011	Minard	2011	UMLS	FALSE	FALSE	FALSE	FALSE	FALSE	FALSE	FALSE	FALSE	FALSE	FALSE	FALSE	FALSE	FALSE	FALSE	FALSE	FALSE	FALSE	FALSE	FALSE	FALSE	FALSE	FALSE	FALSE	FALSE	FALSE	TRUE	FALSE
2019	Mishra 2019	Mishra	2019	UMLS and HPO	FALSE	FALSE	FALSE	FALSE	FALSE	FALSE	TRUE	FALSE	FALSE	FALSE	FALSE	FALSE	FALSE	FALSE	FALSE	FALSE	FALSE	FALSE	FALSE	FALSE	FALSE	FALSE	FALSE	FALSE	FALSE	TRUE	FALSE
2019	Nguyen 2018	Nguyen	2018	SNOMED CT and ICD-10-AM	FALSE	FALSE	FALSE	FALSE	FALSE	FALSE	FALSE	FALSE	FALSE	FALSE	TRUE	FALSE	FALSE	FALSE	FALSE	FALSE	FALSE	FALSE	FALSE	FALSE	FALSE	FALSE	FALSE	FALSE	FALSE	TRUE	FALSE
2018	Oellrich 2015	Oellrich	2015	UMLS	FALSE	FALSE	FALSE	FALSE	FALSE	FALSE	FALSE	FALSE	FALSE	FALSE	FALSE	FALSE	FALSE	FALSE	FALSE	FALSE	FALSE	FALSE	FALSE	FALSE	FALSE	FALSE	FALSE	FALSE	FALSE	TRUE	FALSE
2018	Patrick 2011	Patrick	2011	UMLS, SNOMED CT	FALSE	FALSE	FALSE	FALSE	FALSE	FALSE	FALSE	FALSE	FALSE	FALSE	FALSE	FALSE	FALSE	FALSE	FALSE	FALSE	FALSE	FALSE	FALSE	FALSE	FALSE	FALSE	FALSE	FALSE	TRUE	TRUE	FALSE
2019	Pérez 2018	Pérez	2018	ICD	FALSE	FALSE	FALSE	FALSE	FALSE	FALSE	FALSE	TRUE	FALSE	FALSE	FALSE	FALSE	FALSE	FALSE	FALSE	FALSE	FALSE	FALSE	FALSE	FALSE	FALSE	FALSE	FALSE	FALSE	FALSE	FALSE	FALSE
2019	Reátegui 2018	Reátegui	2018	UMLS, SNOMED and RxNorm	FALSE	FALSE	FALSE	FALSE	FALSE	FALSE	FALSE	FALSE	FALSE	FALSE	FALSE	FALSE	FALSE	FALSE	FALSE	FALSE	FALSE	FALSE	FALSE	FALSE	FALSE	FALSE	TRUE	FALSE	TRUE	TRUE	FALSE
2018	Roberts 2011	Roberts	2011	UMLS, ICD-9	FALSE	FALSE	FALSE	FALSE	FALSE	FALSE	FALSE	TRUE	FALSE	FALSE	FALSE	FALSE	FALSE	FALSE	FALSE	FALSE	FALSE	FALSE	FALSE	FALSE	FALSE	FALSE	FALSE	FALSE	FALSE	TRUE	FALSE
2019	Rousseau 2019	Rousseau	2019	UMLS: SNOMED CT + RadLex	FALSE	FALSE	FALSE	FALSE	FALSE	FALSE	FALSE	FALSE	FALSE	FALSE	FALSE	FALSE	FALSE	FALSE	FALSE	FALSE	FALSE	FALSE	FALSE	FALSE	FALSE	TRUE	FALSE	FALSE	TRUE	FALSE	FALSE
2018	Savova 2010	Savova	2010	UMLS, SNOMED CT, RxNorm	FALSE	FALSE	FALSE	FALSE	FALSE	FALSE	FALSE	FALSE	FALSE	FALSE	FALSE	FALSE	FALSE	FALSE	FALSE	FALSE	FALSE	FALSE	FALSE	FALSE	FALSE	FALSE	TRUE	FALSE	FALSE	TRUE	FALSE
2018	Shivade 2015	Shivade	2015	UMLS	FALSE	FALSE	FALSE	FALSE	FALSE	FALSE	FALSE	FALSE	FALSE	FALSE	FALSE	FALSE	FALSE	FALSE	FALSE	FALSE	FALSE	FALSE	FALSE	FALSE	FALSE	FALSE	FALSE	FALSE	FALSE	TRUE	FALSE
2019	Shoenbill 2019	Shoenbill	2019	UMLS and SNOMED CT	FALSE	FALSE	FALSE	FALSE	FALSE	FALSE	FALSE	FALSE	FALSE	FALSE	FALSE	FALSE	FALSE	FALSE	FALSE	FALSE	FALSE	FALSE	FALSE	FALSE	FALSE	FALSE	FALSE	FALSE	TRUE	TRUE	FALSE
2018	Sohn 2014	Sohn	2014	RxNorm	FALSE	FALSE	FALSE	FALSE	FALSE	FALSE	FALSE	FALSE	FALSE	FALSE	FALSE	FALSE	FALSE	FALSE	FALSE	FALSE	FALSE	FALSE	FALSE	FALSE	FALSE	FALSE	TRUE	FALSE	FALSE	FALSE	FALSE
2018	Solti 2008	Solti	2008	UMLS	FALSE	FALSE	FALSE	FALSE	FALSE	FALSE	FALSE	FALSE	FALSE	FALSE	FALSE	FALSE	FALSE	FALSE	FALSE	FALSE	FALSE	FALSE	FALSE	FALSE	FALSE	FALSE	FALSE	FALSE	FALSE	TRUE	FALSE
2019	Soriano 2019	Soriano	2019	SNOMED CT	FALSE	FALSE	FALSE	FALSE	FALSE	FALSE	FALSE	FALSE	FALSE	FALSE	FALSE	FALSE	FALSE	FALSE	FALSE	FALSE	FALSE	FALSE	FALSE	FALSE	FALSE	FALSE	FALSE	FALSE	TRUE	FALSE	FALSE
2018	Soysal 2018	Soysal	2018	UMLS	FALSE	FALSE	FALSE	FALSE	FALSE	FALSE	FALSE	FALSE	FALSE	FALSE	FALSE	FALSE	FALSE	FALSE	FALSE	FALSE	FALSE	FALSE	FALSE	FALSE	FALSE	FALSE	FALSE	FALSE	FALSE	TRUE	FALSE
2018	Spasić 2015	Spasić	2015	TRAK, UMLS, MEDCIN, RadLex	FALSE	FALSE	FALSE	FALSE	FALSE	FALSE	FALSE	FALSE	FALSE	FALSE	FALSE	FALSE	FALSE	FALSE	FALSE	FALSE	FALSE	TRUE	FALSE	FALSE	FALSE	TRUE	FALSE	TRUE	FALSE	TRUE	FALSE
2018	Strauss 2013	Strauss	2013	SNOMED CT	FALSE	FALSE	FALSE	FALSE	FALSE	FALSE	FALSE	FALSE	FALSE	FALSE	FALSE	FALSE	FALSE	FALSE	FALSE	FALSE	FALSE	FALSE	FALSE	FALSE	FALSE	FALSE	FALSE	FALSE	TRUE	FALSE	FALSE
2018	Sung 2018	Sung	2018	UMLS	FALSE	FALSE	FALSE	FALSE	FALSE	FALSE	FALSE	FALSE	FALSE	FALSE	FALSE	FALSE	FALSE	FALSE	FALSE	FALSE	FALSE	FALSE	FALSE	FALSE	FALSE	FALSE	FALSE	FALSE	FALSE	TRUE	FALSE
2019	Tchechmedjiev 2018	Tchechmedjiev	2018	UMLS terminologies (ICD-10)	FALSE	FALSE	FALSE	FALSE	FALSE	FALSE	FALSE	FALSE	FALSE	TRUE	FALSE	FALSE	FALSE	FALSE	FALSE	FALSE	FALSE	FALSE	FALSE	FALSE	FALSE	FALSE	FALSE	FALSE	FALSE	TRUE	FALSE
2019	Ternois 2018	Ternois	2018	CCAM	FALSE	TRUE	FALSE	FALSE	FALSE	FALSE	FALSE	FALSE	FALSE	FALSE	FALSE	FALSE	FALSE	FALSE	FALSE	FALSE	FALSE	FALSE	FALSE	FALSE	FALSE	FALSE	FALSE	FALSE	FALSE	FALSE	FALSE
2018	Travers 2004	Travers	2004	UMLS	FALSE	FALSE	FALSE	FALSE	FALSE	FALSE	FALSE	FALSE	FALSE	FALSE	FALSE	FALSE	FALSE	FALSE	FALSE	FALSE	FALSE	FALSE	FALSE	FALSE	FALSE	FALSE	FALSE	FALSE	FALSE	TRUE	FALSE
2019	Tulkens 2019	Tulkens	2019	UMLS	FALSE	FALSE	FALSE	FALSE	FALSE	FALSE	FALSE	FALSE	FALSE	FALSE	FALSE	FALSE	FALSE	FALSE	FALSE	FALSE	FALSE	FALSE	FALSE	FALSE	FALSE	FALSE	FALSE	FALSE	FALSE	TRUE	FALSE
2019	Usui 2018	Usui	2018	ICD-10	FALSE	FALSE	FALSE	FALSE	FALSE	FALSE	FALSE	FALSE	FALSE	TRUE	FALSE	FALSE	FALSE	FALSE	FALSE	FALSE	FALSE	FALSE	FALSE	FALSE	FALSE	FALSE	FALSE	FALSE	FALSE	FALSE	FALSE
2019	Valtchinov 2019	Valtchinov	2019	SNOMED CT + RadLex	FALSE	FALSE	FALSE	FALSE	FALSE	FALSE	FALSE	FALSE	FALSE	FALSE	FALSE	FALSE	FALSE	FALSE	FALSE	FALSE	FALSE	FALSE	FALSE	FALSE	FALSE	TRUE	FALSE	FALSE	TRUE	FALSE	FALSE
2019	Wadia 2018	Wadia	2018	SNOMED CT / UMLS	FALSE	FALSE	FALSE	FALSE	FALSE	FALSE	FALSE	FALSE	FALSE	FALSE	FALSE	FALSE	FALSE	FALSE	FALSE	FALSE	FALSE	FALSE	FALSE	FALSE	FALSE	FALSE	FALSE	FALSE	TRUE	TRUE	FALSE
2019	Walker 2019	Walker	2019	UMLS	FALSE	FALSE	FALSE	FALSE	FALSE	FALSE	FALSE	FALSE	FALSE	FALSE	FALSE	FALSE	FALSE	FALSE	FALSE	FALSE	FALSE	FALSE	FALSE	FALSE	FALSE	FALSE	FALSE	FALSE	FALSE	TRUE	FALSE
2019	Xie 2019	Xie	2019	ICD-9-CM & ICD-10	FALSE	FALSE	FALSE	FALSE	FALSE	FALSE	FALSE	FALSE	TRUE	TRUE	FALSE	FALSE	FALSE	FALSE	FALSE	FALSE	FALSE	FALSE	FALSE	FALSE	FALSE	FALSE	FALSE	FALSE	FALSE	FALSE	FALSE
2018	Xu 2011	Xu	2011	UMLS	FALSE	FALSE	FALSE	FALSE	FALSE	FALSE	FALSE	FALSE	FALSE	FALSE	FALSE	FALSE	FALSE	FALSE	FALSE	FALSE	FALSE	FALSE	FALSE	FALSE	FALSE	FALSE	FALSE	FALSE	FALSE	TRUE	FALSE
2018	Yadav 2013	Yadav	2013	UMLS	FALSE	FALSE	FALSE	FALSE	FALSE	FALSE	FALSE	FALSE	FALSE	FALSE	FALSE	FALSE	FALSE	FALSE	FALSE	FALSE	FALSE	FALSE	FALSE	FALSE	FALSE	FALSE	FALSE	FALSE	FALSE	TRUE	FALSE
2019	Yao 2019	Yao	2019	UMLS	FALSE	FALSE	FALSE	FALSE	FALSE	FALSE	FALSE	FALSE	FALSE	FALSE	FALSE	FALSE	FALSE	FALSE	FALSE	FALSE	FALSE	FALSE	FALSE	FALSE	FALSE	FALSE	FALSE	FALSE	FALSE	TRUE	FALSE
2019	Zeng 2018	Zeng	2018	UMLS	FALSE	FALSE	FALSE	FALSE	FALSE	FALSE	FALSE	FALSE	FALSE	FALSE	FALSE	FALSE	FALSE	FALSE	FALSE	FALSE	FALSE	FALSE	FALSE	FALSE	FALSE	FALSE	FALSE	FALSE	FALSE	TRUE	FALSE
2018	Zhang 2013	Zhang	2013	UMLS	FALSE	FALSE	FALSE	FALSE	FALSE	FALSE	FALSE	FALSE	FALSE	FALSE	FALSE	FALSE	FALSE	FALSE	FALSE	FALSE	FALSE	FALSE	FALSE	FALSE	FALSE	FALSE	FALSE	FALSE	FALSE	TRUE	FALSE
2018	Zhou 2006	Zhou	2006	UMLS	FALSE	FALSE	FALSE	FALSE	FALSE	FALSE	FALSE	FALSE	FALSE	FALSE	FALSE	FALSE	FALSE	FALSE	FALSE	FALSE	FALSE	FALSE	FALSE	FALSE	FALSE	FALSE	FALSE	FALSE	FALSE	TRUE	FALSE
2018	Zhou 2011	Zhou	2011	SNOMED CT, RxNorm, UMLS, PPL, MDD, HL7 value sets	FALSE	FALSE	FALSE	FALSE	FALSE	TRUE	FALSE	FALSE	FALSE	FALSE	FALSE	FALSE	FALSE	FALSE	FALSE	FALSE	TRUE	FALSE	FALSE	FALSE	TRUE	FALSE	TRUE	FALSE	TRUE	TRUE	FALSE
2018	Zhou 2014	Zhou	2014	SNOMED CT, HL7 RoleCodes	FALSE	FALSE	FALSE	FALSE	FALSE	TRUE	FALSE	FALSE	FALSE	FALSE	FALSE	FALSE	FALSE	FALSE	FALSE	FALSE	FALSE	FALSE	FALSE	FALSE	FALSE	FALSE	FALSE	FALSE	TRUE	FALSE	FALSE

## Sheet: Evaluation
Search	Label	Author	Year	Train size	Dev size	Test size	Ref. std.	Validation	External	Generalizable	Evaluation	ComparisonInternal	ComparisonToOtherTools	ComparisonMetric
2019	Afshar 2019	Afshar	2019	60%: 126.326	44.705 (20%)	20%: 44.705	Existing EHR data	Hold-out validation (train, test, development)	No	No: validation is needed	Compare prediction to Center for Medicare and Medicaid Services rules for index admission and unplanned 30-day readmission.	Different feature combinations	No
2018	Alnazzawi 2016	Alnazzawi	2016	Not listed	Not listed	300 discharge summaries 10 full text literature articles	Existing annotated corpus	External	ShARe/CLEF, NCBI disease, Heart failure and pulmonary embolism corpora	Yes, it can be used on multiple corpora	Compare manual annotations to system output	Multiple developed algorithms	MetaMap, Rules, Dnorm	None
2018	Atutxa 2018	Atutxa	2018	7,079 documents, 588,170 words, 23,130 instances	989 documents, 81,184 words, 2,850 instances	997 documents, 81,495 words, 2,850 instances	Manual expert review (afterwards)	Hold-out validation (train, test, development)	No	Yes, easiliy portable to other languages	Experts manually reviewing the system's annotations	Multiple developed algorithms	No
2018	Barrett 2013	Barrett	2013	1st experiment: 9/10 * 200 2nd experiment: 200	Not used	1st experiment: 1/10 * 200 2nd experiment: 15 consult letters (chosen)	Manual annotations	10-fold cross validation	Yes, multiple datasets (different provider)	Yes, the authors believe it is generalizable	Compare manual annotations to system output		No
2018	Becker 2016	Becker	2016	Not used	Not used	199 notes	Existing annotated corpus	Not used	No	Not listed	Compare English annotations to German annotations		No
2019	Becker 2019	Becker	2019	225 patients (2490 notes)	225 patients (2513 notes) - they call it evaluation (one-time)	50 patients (503 notes)	Manual annotations	Hold-out validation (train, test, development)	No	Not listed	Compare to reference standard	German vs. English notes	No
2018	Bejan 2015	Bejan	2015	Not used	Not used	6864 discharge summaries and the 2010 i2b2/Veteran's Affairs challenge dataset	Manual annotations	External	Yes, i2b2 data	Yes, has good performance on the i2b2 dataset, even though not optimized on it	Compare manual annotations to system output		SEMrep	Randomization test based on stratified shuffling with Bonferroni correctino for multiple testing
2018	Castro 2010	Castro	2010	Not used	Not used	100 notes	Manual annotations	Not used	No	Not listed	Compare manual annotations to system output	Different feature combinations	No
2019	Catling 2018	Catling	2018	69.9% (38.588 records)	10.0% (5536 records) - validation set	20.0% (11.048 records)	Existing annotated corpus	Hold-out validation (train, test, development)	No	Not listed	Compare to reference standard	Different prediction types	No
2018	Chapman 2004	Chapman	2004	Not used	Not used	28 reports (from 15 patient visits)	Manual annotations	Not used	No	Yes, generalizable to other domains within and outside of biosurveillance	Compare manual annotations to system output		No
2018	Chen 2016	Chen	2016	81 notes (cross-validation)	Not used	9 notes (cross-validation)	Manual annotations	10-fold cross validation	No	Not listed	Compare manual annotations to system output		Adapted KEA++ and Random Forest	Paired samples t-test
2018	Chiaramello 2016	Chiaramello	2016	Not used	Not used	3462 unstructured sentences from 100 reports	Manual annotations	Not used	No	Not listed	Compare manual annotations to system output	Different feature combinations	No
2018	Chodey 2016	Chodey	2016	200 reports	Not used	100 reports	Existing annotated corpus	Hold-out validation (train, test)	No	Not listed	Compare manual annotations to system output	Different feature combinations	No
2018	Chung 2005	Chung	2005	295 reports (hospital 1)	Not used	408 reports (188 hospital 1, 220 hospital 2)	Manual annotations	Hold-out validation (train, test)	Reports from a second hospital	Not listed	Compare manual annotations to system output		No
2018	Combi 2018	Combi	2018	Not used	Not used	4445 reports from VigiSegn (data warehouse for Italian Pharmacovigilance National Center) 1805 reports revised ex novo by a group of three experts of the domain (maar 1810 in Table 5?)	Manual annotations	Not used	No	Not listed	Compare manual annotations to system output		No
2018	deBruijn 2011	deBruijn	2011	1176 documents (349 annotated, 827 non-annotated)	Not used	477 documents	Existing annotated corpus	15-fold cross validation	No	Not listed	Compare manual annotations to system output	Different feature combinations	Compared in challenge, not in paper	None
2019	Deisseroth 2019	Deisseroth	2019	Notes of 25 patients (SCH): ClinPhen STARR set (500 patients): phenotype-frequency filter	Not used	Stanford test set (24 patients from SCH): ClinPhen Manton test set (21 patients from Manton, Boston CH): verify findings from Stanford test set Duke/UCLA test sets (14 and 15 paients): gene-ranking tools	Manual annotations	Hold-out validation (train, test)	Yes	Yes "it can be immediately incorporated into clinicalpractice."	Compare coded notes to system output	No	MetaMap, cTAKES	None
2018	Demner-Fushman 2017	Demner-Fushman	2017	Not used	Not used	BioScope: 1954 notes, 9 full-text articles, 1273 abstracts NCBI disease corpus: 793 PubMed abstracts i2b2 2010 collection: 871 clinical notes ShARe corpus: 300 clinical notes LHC test collection: 150 PubMed abstracts and 150 biology-oriented abstracts	Existing annotated corpus	External	Yes, multiple datasets	Not listed	Compare manual annotations to system output		MetaMap, cTAKES, Dnorm	None
2018	Divita 2014	Divita	2014	Not used	Not used	145 clinical records	Manual annotations	Not used	No	Not listed	Compare manual annotations to system output		Metamap, cTAKES	None
2018	Duarte 2018	Duarte	2018	91.152 certificates (75%) of which 2241 clinical bulletin, 4231 autopsy report, 1012 both	Not used	30.384 certificates (25%) of which 762 clinical bulletin, 1422 autopsy report, 336 both	Manual annotations	Hold-out validation (train, test)	Yes, second dataset	Not listed	Compare manual annotations to system output	Multiple developed algorithms	No
2019	Falis 2019	Falis	2019	47.719 documents (758.212 ICD-9) with 36.997 unique patients (8.692 ICD)	1.631 documents (28.896 ICD-9) with 1.374 unique patients (3.012 ICD)	3.372 documents (61.578 ICD-9) with 2.755 unique patients (4.085 ICD)	Existing annotated corpus	Hold-out validation (train, test, development)	No	Yes, "Our method is not specific to anontology, and in fact could be used for a graph ofany formation.'	Compare to reference standard	Different models	Other models: Mullenbach et al, Sadoughi et al	None
2018	Ferrão 2013	Ferrão	2013	3074 inpatient adult episodes	Not used	768 inpatient adult episodes	Existing EHR data	Hold-out validation (train, test)	No	Not listed	Compare coded data to system output		No
2018	Gerbier 2011	Gerbier	2011	158 patient records	Not used	100 patient records	Manual annotations	Hold-out validation (train, test)	No	Yes, it could also serve other types of clinical decision support systems	Compare manual annotations to system output		No
2018	GoicoecheaSalazar 2013	GoicoecheaSalazar	2013	3042695 records	Not used	3072861 records (of which 385 were annotated)	Manual annotations	Hold-out validation (train, test)	No	Not listed	Compare a sample of records to annotated version		No
2019	Hamid 2013	Hamid	2013	9/10 * 1101 = 991 charts	Not used	1/10 * 1101 = 110 charts	Manual annotations	10-fold cross validation	No	Possible; the classifier may be applicable in academic hospital samples	Compare coded to system output	No	No
2018	Hassanzadeh 2016	Hassanzadeh	2016	199 clinical documents	Not used	99 clinical documents	Existing annotated corpus	Hold-out validation (train, test)	No	N/A	Compare manual annotations to system output		MetaMap, NCBO annotator, Ontoserver, QuickUMLS	None
2018	Helwe 2017	Helwe	2017	80% of MIMIC-III dataset	10% of MIMIC-III dataset	10% of MIMIC-III dataset	Existing annotated corpus	Hold-out validation (train, test, development)	No	Not listed	Compare manual annotations to system output	Multiple developed algorithms	No
2018	Hersh 2001	Hersh	2001	14 reports	Not used	36 reports	Manual annotations	Hold-out validation (train, test)	No	Not listed, but advised to train on larger set (because of overfitting)	Compare manual annotations to system output	Multiple developed algorithms	No
2018	Hoogendoorn 2015	Hoogendoorn	2015	72000 cases	Not used	18000 cases	Existing EHR data	5-fold cross validation	No	Not listed	Compare coded data to system output	Different feature combinations	No
2018	Jindal 2013	Jindal	2013	120 records	Not used	190 records	Existing annotated corpus	Hold-out validation (train, test)	No	Yes, broad applicability	Compare manual annotations to system output		Other i2b2 systems	Not listed
2018	Kang 2009	Kang	2009	33886 concepts (101595 phrase units)	Not used	1204 simple CCs (in 15618 discharge summaries)	Manual annotations	Hold-out validation (train, test)	No	Yes, extensible to other languages	Compare manual annotations to system output	Multiple developed algorithms	No
2019	Kersloot 2019	Kersloot	2019	Not used	30	68	Manual annotations	Hold-out validation (development, test)	No	Possible, but external validation is needed	Compare manually annotated charts to system output	Multiple implementations	Original cTAKES	Two-tailed permutation test
2019	König 2019	König	2019	Not used	Not used	1982 charts	Existing EHR data	Not used	No	Still to be tested	Compare output to ref standard	No	No
2018	Li 2015	Li	2015	3893 notes (cross-validation)	Not used	433 notes (cross-validation)	Manual annotations	10-fold cross validation	No	Not listed	Compare manual annotations to system output	Multiple developed algorithms	No
2019	Li 2019	Li	2019	First: Trained on 1M and 500k notes MADE corpus: 876 notes NCBI corpus: 593 abstracts CDR corpus: 500 abstracts	MADE corpus: - NCBI corpus: 100 abstracts CDR corpus: 500 abstracts	MADE corpus: 213 notes NCBI corpus: 100 abstracts CDR corpus: 500 abstracts	Existing annotated corpus	Hold-out validation (train, test, development)	No	Not listed	Compare output to annotated corpus	Two models	BERT/BioBERT/MetaMap	t-test
2018	Lingren 2016	Lingren	2016	377 reports	126 reports	126 reports	Manual annotations	Hold-out validation (train, test, development)	No	Not listed	Compare manual annotations to system output	Different feature combinations (None)	No
2019	Liu 2019	Liu	2019	Not used	Not used	50 clinical notes (40 pediatric notes New York-Presbyterian Hospital / Columbia University Irving Medical Center, and 10 pediatric notes from Mayo Clinic) 50 PubMed case report abstract for Truner Syndrome	Manual annotations	Not used	No (but multiple datasets / non-trained)	No, limited because of NYP/CUIMC and Mayo notes.	Compare output to annotated dataset	Humans and different systems and matching types	MEDLEE, ClinPhen, cTAKES, MetaMapLite	None
2018	Lowe 2009	Lowe	2009	100 reports	Not used	400 reports	Manual expert review (afterwards)	Hold-out validation (train, test)	No	Yes, it has the potential to successfullyindex other classes of clinical documents	Experts manually reviewing the system's annotations		No
2018	Luo 2014	Luo	2014	934 reports (cross-validation)	Not used	104 reports (cross-validation)	Existing EHR data	10-fold cross validation	No	Challenging, not currently working on it	Compare listed diagnosis to system-coded diagnosis		No
2018	Meystre 2006	Meystre	2006	Not used	Not used	160 documents	Manual expert review (afterwards)	Not used	No	Not listed	Experts manually reviewing the system's annotations	Web-based, web-based + NLP and paper-based review (2-tailed test)	No
2019	Meystre 2010	Meystre	2010	696 documents	Not used	553 documents	Existing annotated corpus	Hold-out validation (train, test)	No	Not listed	Compare output to ref standard	No	No
2018	Minard 2011	Minard	2011	241 reports	54 reports	54 reports	Existing annotated corpus	Hold-out validation (train, test, development)	No	Not listed	Compare manual annotations to system output		Compared in challenge, not in paper	Not listed
2019	Mishra 2019	Mishra	2019	Not used	Not used	2.329 notes (of which 200 annotated)	Manual annotations	Not used	No	Not listed	Compare found unique concepts to concepts in reference standard	No	No
2019	Nguyen 2018	Nguyen	2018	Not used	Not used	569,846 patient encounters	Existing EHR data	Not listed	No	Not listed	Compare system output to EMR codes	Different ontologies	No	None
2018	Oellrich 2015	Oellrich	2015	Not used	Not used	i2b2: 693 clinical reports PubMed: 2163 MEDLINE abstracts Clinical Trials: 906 ShARe/CLEF corpus: 99 notes	Existing annotated corpus	External	Yes, multiple datasets	Not listed	Compare silver and gold standards to system output		NCBO, cTAKES, BeCAS, MetaMap	None
2018	Patrick 2011	Patrick	2011	9/10 * 349 records	Not used	1/10 * 349 records	Existing annotated corpus	10-fold cross validation	No	Yes, adaptable to different requirements in clinical information extraction and classification by choosing relevant feature sets	Compare manual annotations to system output		No
2019	Pérez 2018	Pérez	2018	23.130 DT-ICD pairs	2850 DT-ICD pairs	2850 DT-ICD pairs	Existing annotated corpus	Hold-out validation (train, test, development)	No	Yes, "Furthermore,the presented computer aided encoding methodology is extensible todifferent hospital-sections and hospitals due to the fact that it does notuse hand-crafted rules built ad-hoc"	Compare normalized term to dictionary	Different implementations	No
2019	Reátegui 2018	Reátegui	2018	Not used	Not used	412 summaries	Existing annotated corpus	Not used	No	Not listed	Compare system output to coded corpus		MetaMap, cTAKES	None
2018	Roberts 2011	Roberts	2011	349 notes	Not used	477 notes	Existing annotated corpus	Hold-out validation (train, test)	No	Not listed	Compare manual annotations to system output		Compared in challenge, not in paper	Not listed
2019	Rousseau 2019	Rousseau	2019	Not used	Not used	EHR data from 666 patients	Manual annotations	Not used	No	unclear'	Analyses comparing numbers of extracted CUIs to requi-sition indications, evaluating NLP performance, and comparing percentages of head CTs graded as appropriate wereperformed using Microsoft Excel 2007	No	No
2018	Savova 2010	Savova	2010	9/10 * 273 clinical notes for linguistic 9/10 * 160 notes for NER	Not used	1/10 * 273 clinical notes for linguistic 1/10 * 160 notes for NER	Manual annotations	10-fold cross validation	No	Yes, implemented in several applications	Compare manual annotations to system output		No
2018	Shivade 2015	Shivade	2015	790 notes (178 patients)	Not used	514 notes (118 patients)	Manual annotations	Hold-out validation (train, test)	No	Not listed	Not listed, Compare manual annotations to system output		No
2019	Shoenbill 2019	Shoenbill	2019	500 patient records (14.331 notes)	Not used	14360 patient records (403.018 notes)	Manual annotations	Hold-out validation (train, test)	No	yes, "This information can be used in future outcome and comparative effectiveness research and inform metric development for lifestyle modification documentation and counseling" Yes: Its meth-ods and future planned expansion of these methods could be used in studies involving multiple chronic medical conditions	Compare system output to manual annotation	No	No
2018	Sohn 2014	Sohn	2014	159 notes (659 medications)	25 notes (386 medications)	26 notes (397 medications)	Manual annotations	Hold-out validation (train, test, development)	No	Yes, with adaptions: create a flexible mechanism for the adaptation process	Compare manual annotations to system output		NCBO and MedEx	None
2018	Solti 2008	Solti	2008	10 notes	Not used	100 notes	Manual annotations	Hold-out validation (train, test)	No	Not listed	Compare manual problem lists to system problem lists		No
2019	Soriano 2019	Soriano	2019	636439 reports, Wikipedia, Snomed CT concept descriptions	Not listed	?	Manual annotations	Not listed	No	Not listed	Compare to gold standard	No	No
2018	Soysal 2018	Soysal	2018	NER: 2410	Not listed	NER: 150 comparison with other systems: 431 notes	Existing annotated corpus	Hold-out validation (train, test)	No	Yes, it can be used to quickly develop customized clinical information extraction pipelines	Compare manual annotations to system output		MetaMap, MetaMap Light, cTAKES	None
2018	Spasić 2015	Spasić	2015	1368 reports	Not used	100 reports	Manual annotations	Hold-out validation (train, test)	No	Not listed	Compare manual annotations to system output		No
2018	Strauss 2013	Strauss	2013	Not used	Not used	490 breast and 425 prostate cancer patient pathology reports	Manual annotations	Not used	No	Yes, can be shared between institutions and used to support clinical and epideiological research	Compare manual annotations to system output		No
2018	Sung 2018	Sung	2018	Not used	Not used	234 notes (596 phrases)	Manual annotations	Not listed	No	Not listed	Compare manual annotations to system output		No
2019	Tchechmedjiev 2018	Tchechmedjiev	2018	65,844 document and 195,204 lines	7,851 document and 80,900 lines	1,683 docu-ments and 91,954 lines	Existing annotated corpus	Hold-out validation (train, test, development)	No	Yes, but not universally	Compare to coded corpus	Different types of implementations	Average and Median results of CLEF eHealth 2015 Task 1 systems	None
2019	Ternois 2018	Ternois	2018	4/5 * 1639	Not used	1/5 * 1639	Existing EHR data	5-fold cross validation + Hold-out validation (train, test)	No	Not listed	Compare coded report to predicted code	Different algorithms	No
2018	Travers 2004	Travers	2004	Not used	Not used	CC entries for all 203,509 ED visits to thethree sites during the study period	Manual expert review (afterwards)	Not used	No	Not listed	Compare number of standard terms extract before/after cleaning. Check UMLS matching using a review of non-matches.		No
2019	Tulkens 2019	Tulkens	2019	MIMIC for training: 53.423 admissions	170 reports (i2b2)	256 reports (i2b2)	Existing annotated corpus	Hold-out validation (train, test, development)	No	Not listed	Compare to coded corpus	Different models	CubNER, model of DeBruijn et al	None
2019	Usui 2018	Usui	2018	Not used	Not used	5000 complaints	Manual annotations	Not used	No	"After improving the extraction accuracy, we expectto utilize this system to detect signals of possible ADEs from patients’ complaints in the future"	compare with manually annotated	No	No
2019	Valtchinov 2019	Valtchinov	2019	Not used	Not used	465 reports	Manual annotations	Not used	No	No	Compare manual annotations to system output	Experts	No	t-test
2019	Wadia 2018	Wadia	2018	Not used	Not used	446 reports	Manual annotations	Not used	No	Not listed	Compare manual annotations to system output	Manual coding	No
2019	Walker 2019	Walker	2019	Not used	5518 sites	5500 sites	Manual expert review (afterwards)	Hold-out validation (development, test)	No	Could be used in practice	Compare output manually	No	MetaMap, cTAKES	None
2019	Xie 2019	Xie	2019	47,723 samples (full-label) / 8,066 samples (top-50 label)	1,631 samples (full-label) / 1,631 samples (top-50 label)	3,372 samples (full-label) / 1,729 samples (top-50 label)	Existing annotated corpus	Hold-out validation (train, test, development)	No	Not listed	Compare to coded corpus		Different models (Logistic regression, Selected Feature, Bi-GRU, Flat SVMs, Hierarchy SVMs, Text-CNN, DR-CAML, CAML)	None
2018	Xu 2011	Xu	2011	150 cases	Not used	150 cases	Manual annotations	Hold-out validation (train, test)	No	Yes, it is a generable approach to combine information from heterogeneous data sources in EHRs	Compare manual annotations to system output	Multiple developed algorithms (None)	No
2018	Yadav 2013	Yadav	2013	Not used	Not used	507 reports (50% * 3710)	Manual annotations	Not used	No	Yes, should be broadly applicate to outcomes of clinical interest	Compare manual annotations to system output		No
2019	Yao 2019	Yao	2019	11630 textual / 10655 intuitive	Not used	8044 textual / 7399 intuitive	Existing annotated corpus	Hold-out validation (train, test)	No	Not listed	Compare to corpus	No	Method by Solt	None
2019	Zeng 2018	Zeng	2018	701 subjects	Not used	6198 subjects	Manual annotations	5-fold cross validation + Hold-out validation (train, test)	No	Potential to be replicated	Compare predicted to manual annotations	Different methods	MetaMap	None
2018	Zhang 2013	Zhang	2013	Not used	Not used	i2b2: 647 GENIA: 2000	Existing annotated corpus	External	Yes, Two different sets with same settings	Yes, can be adapted to different semantic categories and text genres	Compare manual annotations to system output		MetaMap and supervised system	None
2018	Zhou 2006	Zhou	2006	Not listed	Not listed	125 patient records	Manual annotations	5-fold cross validation	No	Not listed	Compare manual annotations to system output		Other system developed by authors	None
2018	Zhou 2011	Zhou	2011	Not listed	Not used	40 notes	Manual expert review (afterwards)	Hold-out validation (train, test)	No	Not listed	Experts manually reviewing the system's annotations		No
2018	Zhou 2014	Zhou	2014	Not used	Not used	112 documents (NLP)	Manual annotations	Not used	No	Not listed	Compare manual annotations to system output		No

## Sheet: Performance measures
Author	Year	Confusion Matrix	False Positive Rate	False Negative Rate	Information entropy	Mean Reciprocal Rank	Initial annotator agreement	Precision	Recall	F-score	Accuracy	Kappa	Processing time	AUC	Specificity	Match/ no match (%)	NPV	Overgeneration	Undergeneration	Error	Fallout	MSE
Afshar	2019		FALSE	FALSE	FALSE	FALSE	FALSE	TRUE	TRUE	FALSE	FALSE	FALSE	FALSE	TRUE	TRUE	FALSE	TRUE	FALSE	FALSE	FALSE	FALSE	FALSE
Alnazzawi	2016		FALSE	FALSE	FALSE	FALSE	FALSE	TRUE	TRUE	TRUE	TRUE
Atutxa	2018		FALSE	FALSE	FALSE	FALSE	FALSE	TRUE	TRUE	TRUE
Barrett	2013		FALSE	FALSE	FALSE	FALSE	FALSE				TRUE		TRUE
Becker	2016		FALSE	FALSE	FALSE	FALSE	FALSE	TRUE	TRUE	TRUE
Becker	2019	TRUE	TRUE	TRUE	FALSE	FALSE	FALSE	TRUE	TRUE	TRUE	TRUE	FALSE	FALSE	FALSE	TRUE	FALSE	FALSE	FALSE	FALSE	FALSE	FALSE	FALSE
Bejan	2015		FALSE	FALSE	FALSE	FALSE	FALSE	TRUE	TRUE	TRUE
Castro	2010		FALSE	FALSE	FALSE	FALSE	FALSE	TRUE	TRUE	TRUE
Catling	2018		FALSE	FALSE	FALSE	FALSE	FALSE	FALSE	TRUE	FALSE	FALSE	FALSE	FALSE	FALSE	FALSE	FALSE	FALSE	FALSE	FALSE	FALSE	FALSE	FALSE
Chapman	2004		FALSE	FALSE	FALSE	FALSE	FALSE	TRUE	TRUE
Chen	2016		FALSE	FALSE	FALSE	FALSE	FALSE	TRUE	TRUE	TRUE				TRUE
Chiaramello	2016		FALSE	FALSE	FALSE	FALSE	FALSE	TRUE	TRUE	TRUE
Chodey	2016		FALSE	FALSE	FALSE	FALSE	FALSE	TRUE	TRUE	TRUE	TRUE
Chung	2005		FALSE	FALSE	FALSE	FALSE	FALSE	TRUE	TRUE
Combi	2018		FALSE	FALSE	FALSE	FALSE	FALSE	TRUE	TRUE
deBruijn	2011	TRUE	FALSE	FALSE	FALSE	FALSE	FALSE	TRUE	TRUE	TRUE
Deisseroth	2019		FALSE	FALSE	FALSE	FALSE	FALSE	TRUE	TRUE	FALSE	FALSE	FALSE	FALSE	FALSE	FALSE	FALSE	FALSE	FALSE	FALSE	FALSE	FALSE	FALSE
Demner-Fushman	2017		FALSE	FALSE	FALSE	FALSE	FALSE	TRUE	TRUE	TRUE
Divita	2014	TRUE	FALSE	FALSE	FALSE	FALSE	FALSE	TRUE	TRUE	TRUE			TRUE
Duarte	2018		FALSE	FALSE	FALSE	FALSE	FALSE	TRUE	TRUE	TRUE	TRUE
Falis	2019		FALSE	FALSE	FALSE	FALSE	FALSE	TRUE	TRUE	TRUE	FALSE	FALSE	FALSE	FALSE	FALSE	FALSE	FALSE	FALSE	FALSE	FALSE	FALSE	FALSE
Ferrão	2013		FALSE	FALSE	FALSE	FALSE	FALSE	TRUE	TRUE	TRUE
Gerbier	2011	TRUE	FALSE	FALSE	FALSE	FALSE	FALSE	TRUE	TRUE
GoicoecheaSalazar	2013		FALSE	FALSE	FALSE	FALSE	FALSE		TRUE	TRUE	TRUE
Hamid	2013		FALSE	FALSE	FALSE	FALSE	FALSE	TRUE	TRUE	TRUE	FALSE	FALSE	FALSE	FALSE	FALSE	FALSE	FALSE	FALSE	FALSE	FALSE	FALSE	FALSE
Hassanzadeh	2016		FALSE	FALSE	FALSE	FALSE	FALSE	TRUE	TRUE	TRUE
Helwe	2017		FALSE	FALSE	FALSE	FALSE	FALSE			TRUE
Hersh	2001	TRUE	FALSE	FALSE	FALSE	FALSE	FALSE	TRUE	TRUE
Hoogendoorn	2015		FALSE	FALSE	FALSE	FALSE	FALSE	TRUE	TRUE	TRUE				TRUE								TRUE
Jindal	2013	TRUE	FALSE	FALSE	FALSE	FALSE	FALSE	TRUE	TRUE	TRUE
Kang	2009		FALSE	FALSE	FALSE	FALSE	FALSE			TRUE
Kersloot	2019	TRUE	FALSE	FALSE	FALSE	FALSE	FALSE	TRUE	TRUE	TRUE	FALSE	FALSE	FALSE	FALSE	FALSE	FALSE	FALSE	FALSE	FALSE	FALSE	FALSE	FALSE
König	2019	TRUE	FALSE	FALSE	FALSE	FALSE	FALSE	TRUE	TRUE	TRUE	FALSE	FALSE	FALSE	FALSE	FALSE	FALSE	FALSE	FALSE	FALSE	FALSE	FALSE	FALSE
Li	2015		FALSE	FALSE	FALSE	FALSE	FALSE	TRUE	TRUE	TRUE
Li	2019		FALSE	FALSE	FALSE	FALSE	FALSE	TRUE	TRUE	TRUE	FALSE	FALSE	FALSE	FALSE	FALSE	FALSE	FALSE	FALSE	FALSE	FALSE	FALSE	FALSE
Lingren	2016		FALSE	FALSE	FALSE	FALSE	FALSE	TRUE	TRUE	TRUE
Liu	2019		FALSE	FALSE	TRUE	FALSE	FALSE	TRUE	TRUE	FALSE	FALSE	FALSE	FALSE	FALSE	FALSE	FALSE	FALSE	FALSE	FALSE	FALSE	FALSE	FALSE
Lowe	2009		FALSE	FALSE	FALSE	FALSE	FALSE	TRUE
Luo	2014		FALSE	FALSE	FALSE	FALSE	FALSE	TRUE	TRUE	TRUE
Meystre	2006		FALSE	FALSE	FALSE	FALSE	FALSE	TRUE	TRUE	TRUE	TRUE							TRUE	TRUE	TRUE	TRUE
Meystre	2010		FALSE	FALSE	FALSE	FALSE	FALSE	TRUE	TRUE	TRUE	FALSE	FALSE	FALSE	FALSE	FALSE	FALSE	FALSE	FALSE	FALSE	FALSE	FALSE	FALSE
Minard	2011		FALSE	FALSE	FALSE	FALSE	FALSE	TRUE	TRUE	TRUE
Mishra	2019		FALSE	FALSE	FALSE	FALSE	FALSE	TRUE	TRUE	TRUE	FALSE	FALSE	FALSE	FALSE	FALSE	FALSE	FALSE	FALSE	FALSE	FALSE	FALSE	FALSE
Nguyen	2018		FALSE	FALSE	FALSE	FALSE	FALSE	TRUE	TRUE	TRUE	FALSE	FALSE	FALSE	FALSE	FALSE	FALSE	FALSE	FALSE	FALSE	FALSE	FALSE	FALSE
Oellrich	2015		FALSE	FALSE	FALSE	FALSE	FALSE	TRUE	TRUE	TRUE
Patrick	2011		FALSE	FALSE	FALSE	FALSE	FALSE	TRUE	TRUE	TRUE
Pérez	2018		FALSE	FALSE	FALSE	TRUE	FALSE	FALSE	FALSE	FALSE	TRUE	FALSE	FALSE	FALSE	FALSE	FALSE	FALSE	FALSE	FALSE	FALSE	FALSE	FALSE
Reátegui	2018		FALSE	FALSE	FALSE	FALSE	FALSE	TRUE	TRUE	TRUE	FALSE	FALSE	FALSE	FALSE	FALSE	FALSE	FALSE	FALSE	FALSE	FALSE	FALSE	FALSE
Roberts	2011		FALSE	FALSE	FALSE	FALSE	FALSE	TRUE	TRUE	TRUE
Rousseau	2019		FALSE	FALSE	FALSE	FALSE	FALSE	TRUE	TRUE	TRUE	FALSE	FALSE	FALSE	FALSE	FALSE	FALSE	FALSE	FALSE	FALSE	FALSE	FALSE	FALSE
Savova	2010		FALSE	FALSE	FALSE	FALSE	FALSE	TRUE	TRUE	TRUE	TRUE
Shivade	2015		FALSE	FALSE	FALSE	FALSE	FALSE	TRUE	TRUE	TRUE
Shoenbill	2019		FALSE	FALSE	FALSE	FALSE	TRUE	TRUE	TRUE	TRUE	FALSE	FALSE	FALSE	FALSE	FALSE	FALSE	FALSE	FALSE	FALSE	FALSE	FALSE	FALSE
Sohn	2014		FALSE	FALSE	FALSE	FALSE	FALSE	TRUE	TRUE	TRUE
Solti	2008		FALSE	FALSE	FALSE	FALSE	FALSE	TRUE	TRUE
Soriano	2019		FALSE	FALSE	FALSE	FALSE	FALSE	TRUE	TRUE	TRUE	FALSE	FALSE	FALSE	FALSE	FALSE	FALSE	FALSE	FALSE	FALSE	FALSE	FALSE	FALSE
Soysal	2018		FALSE	FALSE	FALSE	FALSE	FALSE	TRUE	TRUE	TRUE			TRUE
Spasić	2015	TRUE	FALSE	FALSE	FALSE	FALSE	FALSE	TRUE	TRUE	TRUE
Strauss	2013		FALSE	FALSE	FALSE	FALSE	FALSE	TRUE	TRUE			TRUE			TRUE		TRUE
Sung	2018		FALSE	FALSE	FALSE	FALSE	FALSE	TRUE	TRUE	TRUE
Tchechmedjiev	2018	TRUE	FALSE	FALSE	FALSE	FALSE	FALSE	TRUE	TRUE	TRUE	FALSE	FALSE	FALSE	FALSE	FALSE	FALSE	FALSE	FALSE	FALSE	FALSE	FALSE	FALSE
Ternois	2018		FALSE	FALSE	FALSE	FALSE	FALSE	TRUE	TRUE	TRUE	FALSE	FALSE	FALSE	FALSE	FALSE	FALSE	FALSE	FALSE	FALSE	FALSE	FALSE	FALSE
Travers	2004		FALSE	FALSE	FALSE	FALSE	FALSE					TRUE				TRUE
Tulkens	2019		FALSE	FALSE	FALSE	FALSE	FALSE	TRUE	TRUE	TRUE	FALSE	FALSE	FALSE	FALSE	FALSE	FALSE	FALSE	FALSE	FALSE	FALSE	FALSE	FALSE
Usui	2018	TRUE	FALSE	FALSE	FALSE	FALSE	FALSE	TRUE	TRUE	TRUE	FALSE	FALSE	FALSE	FALSE	FALSE	FALSE	FALSE	FALSE	FALSE	FALSE	FALSE	FALSE
Valtchinov	2019		FALSE	FALSE	FALSE	FALSE	FALSE	FALSE	TRUE	FALSE	TRUE	FALSE	FALSE	FALSE	TRUE	FALSE	FALSE	FALSE	FALSE	FALSE	FALSE	FALSE
Wadia	2018	TRUE	FALSE	FALSE	FALSE	FALSE	FALSE	TRUE	TRUE	FALSE	FALSE	FALSE	FALSE	FALSE	TRUE	FALSE	TRUE	FALSE	FALSE	FALSE	FALSE	FALSE
Walker	2019		FALSE	FALSE	FALSE	FALSE	FALSE	TRUE	TRUE	FALSE	FALSE	FALSE	FALSE	FALSE	FALSE	FALSE	FALSE	FALSE	FALSE	FALSE	FALSE	FALSE
Xie	2019		FALSE	FALSE	FALSE	FALSE	FALSE	FALSE	FALSE	TRUE	FALSE	FALSE	FALSE	TRUE	FALSE	FALSE	FALSE	FALSE	FALSE	FALSE	FALSE	FALSE
Xu	2011		FALSE	FALSE	FALSE	FALSE	FALSE	TRUE	TRUE	TRUE	TRUE				TRUE
Yadav	2013		FALSE	FALSE	FALSE	FALSE	FALSE					TRUE
Yao	2019		FALSE	FALSE	FALSE	FALSE	FALSE	FALSE	FALSE	TRUE	FALSE	FALSE	FALSE	FALSE	FALSE	FALSE	FALSE	FALSE	FALSE	FALSE	FALSE	FALSE
Zeng	2018		FALSE	FALSE	FALSE	FALSE	FALSE	TRUE	TRUE	TRUE	FALSE	FALSE	FALSE	TRUE	FALSE	FALSE	FALSE	FALSE	FALSE	FALSE	FALSE	FALSE
Zhang	2013		FALSE	FALSE	FALSE	FALSE	FALSE	TRUE	TRUE	TRUE
Zhou	2006		FALSE	FALSE	FALSE	FALSE	FALSE	TRUE	TRUE
Zhou	2011		FALSE	FALSE	FALSE	FALSE	FALSE	TRUE	TRUE	TRUE
Zhou	2014		FALSE	FALSE	FALSE	FALSE	FALSE	TRUE	TRUE	TRUE
